# Supplementary material for: Molecular Characterization of the Ghrelin and Ghrelin Receptor Genes and Effects on Fat Deposition in Chicken and Duck
Source: Hindawi journal article supplement (doi:10.1155/2009/567120), 2009-01-01
Supplement: f3 [file 567120.f3.pdf]

**Supplemental Table 1.**

The relative mRNA expression levels of the *cGHRL*, *cGHSR*, *dGHRL* and *dGHSR* genes in 18 tissues of adult birds.

| No | Tissues          | <i>cGHRL</i> gene ( $\times 10^{-5}$ ) |                  | <i>dGHRL</i> gene ( $\times 10^{-5}$ ) |                  | <i>cGHSR</i> gene ( $\times 10^{-5}$ ) |                | <i>dGHSR</i> gene ( $\times 10^{-5}$ ) |              |
|----|------------------|----------------------------------------|------------------|----------------------------------------|------------------|----------------------------------------|----------------|----------------------------------------|--------------|
|    |                  | HB                                     | LY               | PT                                     | SW               | HB                                     | LY             | PT                                     | SW           |
| 1  | pituitary        | 93.25±24.424                           | 24.15±11.45      | 67.64±24.55                            | 38.85±24.55      | 279.25±105.68                          | 103.97±129.44  | 120.01±64.62                           | 215.61±72.25 |
| 2  | cerebrum         | 57.17±10.15                            | 31.63±10.15      | 11.29±10.34                            | 28.11±11.33      | 408.73±155.34                          | 68.33±155.34   | 33.64±7.95                             | 36.68±8.71   |
| 3  | lung             | 21.94±3.48                             | 3.10±3.51        | 19.33±6.98                             | 3.10±5.40        | 29.88±59.22                            | 136.56±48.35   | 3.00±1.38                              | 2.86±1.23    |
| 4  | abdominal fat    | 9.38±71.31                             | 90.52±63.78      | 24.16±175.06                           | 396.00±175.06    | 356.54±197.32                          | 370.17±216.15  | 15.90±15.26                            | 19.02±13.65  |
| 5  | liver            | 2.29±0.73                              | 1.31±0.51        | 8.00±3.21                              | 44.12±18.53      | 102.01±172.91                          | 417.30±149.74  | 3.32±0.85                              | 1.69±0.56    |
| 6  | testicle         | 10.56±4.97                             | 1.03±9.94        | 300.83±210.80                          | 3.22±21.80       | 144.45±47.58                           | 109.09±95.16   | 36.77±49.06                            | 102.11±49.06 |
| 7  | gizzard          | 22.21±11.67                            | 2.01±1.17        | 2.64±3.38                              | 8.33±3.38        | 87.23±46.32                            | 46.34±50.74    | 3.35±1.54                              | 0.98±1.69    |
| 8  | subcutaneous fat | 563.00±326.60                          | 79.98±24.89      | 44.05±46.54                            | 1407.61±424.86   | 526.57±115.81                          | 277.08±87.55   | 161.60±60.46                           | 19.39±55.19  |
| 9  | spleen           | 9.16±5.32                              | 1.92±5.32        | 0.44±2.53                              | 5.33±1.46        | 127.21±165.97                          | 428.13±165.97  | 3.32±1.57                              | 0.63±1.11    |
| 10 | kidney           | 14.34±2.67                             | 2.87±2.67        | 8.29±5.79                              | 8.85±5.29        | 29.87±9.91                             | 15.19±11.44    | 9.98±7.48                              | 13.60±7.48   |
| 11 | leg muscle       | 20.31±4.20                             | 7.52±4.60        | 39.72±39.30                            | 56.02±35.15      | 528.06±214.07                          | 2.55.95±262.18 | 12.56±6.50                             | 10.18±5.93   |
| 12 | urophygial gland | 5.91±2.61                              | 5.89±2.38        | 504.55±214.64                          | 44.80±235.13     | 387.06±173.18                          | 125.16±158.09  | 2.71±2.23                              | 3.73±2.23    |
| 13 | hypothalamus     | 164.10±124.04                          | 3.90±15.19       | 4.45±8.10                              | 21.90±9.06       | 229.63±51.19                           | 38.97±56.08    | 45.38±23.34                            | 110.67±25.57 |
| 14 | small intestine  | 102.88±33.16                           | 7.35±36.33       | 11.19±10.40                            | 13.06±8.49       | 58.80±59.92                            | 139.90±73.39   | 889.32±22.37                           | 60.21±18.26  |
| 15 | cerebellum       | 10.91±4.19                             | 6.35±4.20        | 2.75±2.84                              | 6.85±2.84        | 67.06±23.68                            | 64.36±23.68    | 71.12±11.51                            | 44.61±12.60  |
| 16 | heart            | 77.74±41.60                            | 3.77±46.51       | 7.38±19.13                             | 30.04±13.53      | 345.61±119.56                          | 255.58±119.56  | 25.84±10.75                            | 5.32±8.77    |
| 17 | breast muscle    | 106.14±42.23                           | 37.70±46.26      | 274.18±137.07                          | 180.36±137.07    | 1160.93±832.10                         | 6868.00±945.11 | 3.72±2.72                              | 7.74±2.94    |
| 18 | proventriculus   | 7142.13±4999.12                        | 20709.25±6122.64 | 13157±1129.46                          | 77603.88±1219.77 | 265.98±106.50                          | 167.66±119.07  | 5.37±1.74                              | 2.55±1.59    |
