# Supplementary figures and images for: Molecular Characterization of the Ghrelin and Ghrelin Receptor Genes and Effects on Fat Deposition in Chicken and Duck
Source: Hindawi journal article supplement (doi:10.1155/2009/567120), 2009-01-01

**Supplemental Fig. 1.** Genotyping profiles by sequencing and PCR-RFLP.

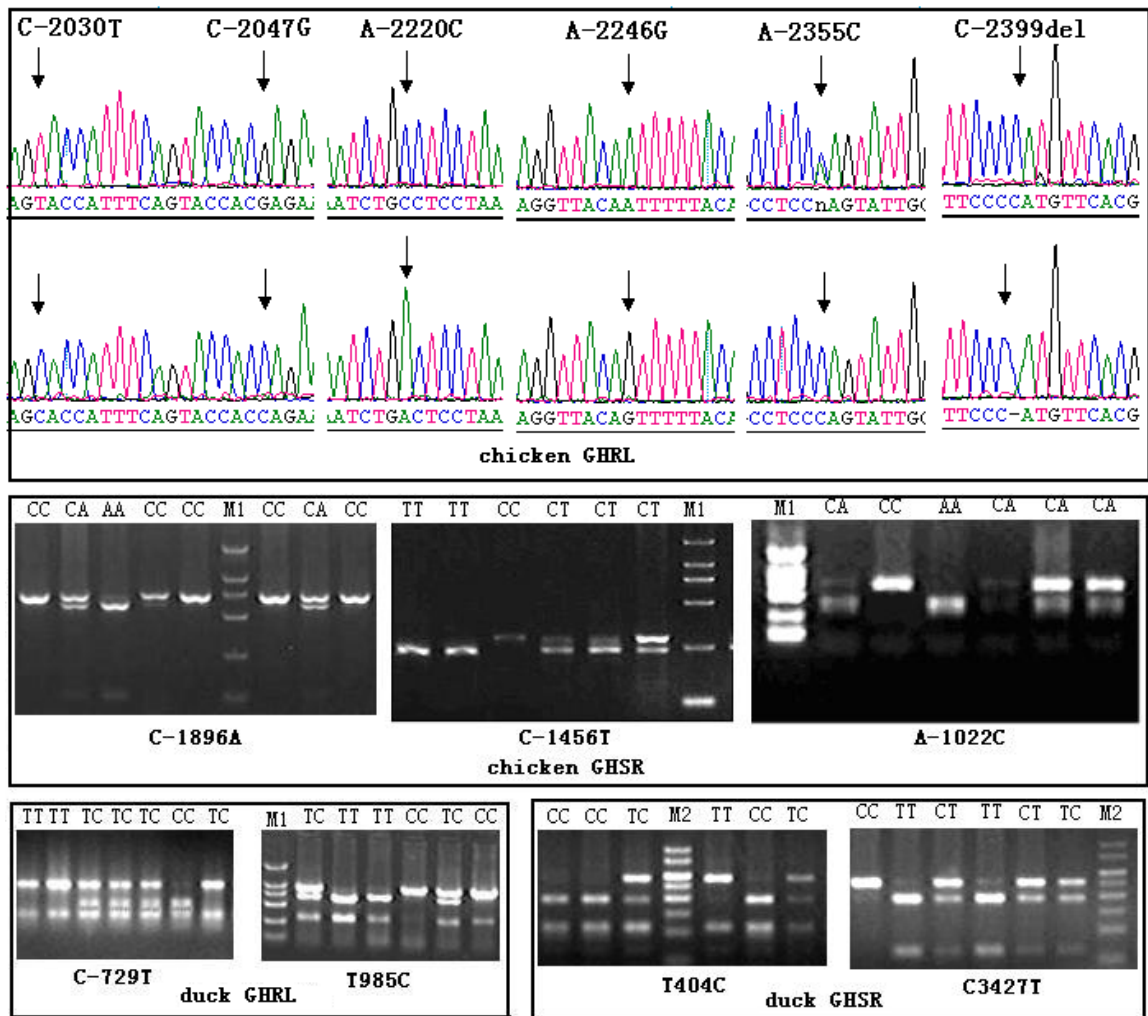

Supplement: f1 [file 567120.f1.pdf]
